# Supplementary material
Source: Springer Nature journal article supplement (https://www.springermedizin.de/resource/supplementary/12880_2013_214_MOESM8_ESM.pdf/9450316)

# Residual Plots for Mean Sens

## Normal Probability Plot

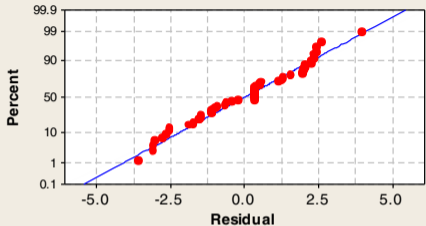

## Versus Fits

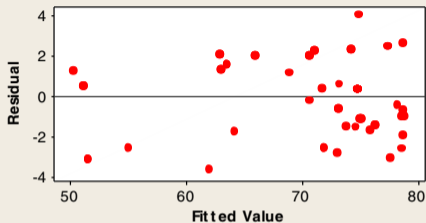

## Histogram

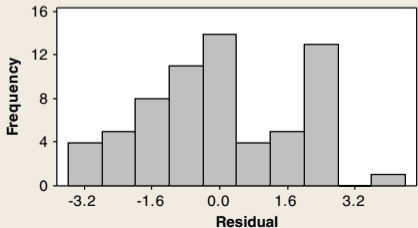

## Versus Order

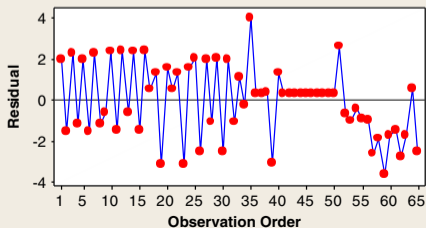

Supplement: MOESM8 [file 9450316]
